# Supplementary material
Source: PubMed Central journal article supplement (PMC6430122)
Supplement: NIHMS1504206-supplement-1.pdf [file NIHMS1504206-supplement-1.pdf]

Supplementary Note

Supplementary Methods

Supplementary Methods References

Supplementary Table Captions

Supplementary Tables 1-4

## Supplementary Methods

### **Targeted-deletion hemizygote construction by homologous recombination**

A given targeted hemizygote for each RH-seq hit gene except *TAF2* was generated in the *S. cerevisiae* DBVPG1373 x *S. paradoxus* Z1 hybrid (JR507) by knocking out the allele of the gene from one species via homologous recombination with KANMX as described<sup>37</sup> with 70 base pairs of homology on the 5' and 3' ends of the cassette; checking was via diagnostic PCR. Two or more independent transformants were isolated and phenotyped for each hemizygote genotype (Supplementary Table 2).

### **Construction of allele replacement and targeted hemizygote strains with Cas9**

At each RH-seq hit gene, we constructed strains in wild-type homozygous diploid *S. cerevisiae* DBVPG1373 in which both copies of the endogenous allele were replaced by the allele from an *S. paradoxus* isolate (Z1 for Figure 3 and Supplementary Figures 8 and 9, and other strains as indicated for Supplementary Figure 10), and likewise for replacement of alleles from *S. cerevisiae* (DBVPG1373 in Figure 3 and Supplementary Figures 8 and 9, and other strains as indicated for Supplementary Figure 10) into *S. paradoxus* Z1. We call each such strain an allele-replacement strain, and each was constructed using a dual-guide Cas9 transgenesis method<sup>38</sup> in which a linear PCR fragment from the donor species is incorporated into the recipient genome by homology-directed repair of two chromosomal double-strand breaks induced by Cas9. Briefly, for each allele of each gene, we designed two guide RNAs for double-strand breaks by Cas9: one guide targeted a position ~1000 base pairs 5' to the coding start or at the

3' end of the closest upstream gene, whichever was closer, and the other guide targeted the region of the coding stop. The precise cut site of each was chosen to contain an NGG immediately downstream of variants between the *S. cerevisiae* and *S. paradoxus* strains, to avoid re-cutting of the donor allele by Cas9 after it had been introduced into the recipient strain. We cloned the two guide RNAs, a KANMX cassette, and the gene encoding the *S. pyogenes* Cas9 protein into a single plasmid as described<sup>38</sup>. The resulting plasmid was propagated in DH5a *E. coli* and minipreped with a column miniprep kit (Qiagen). Separately, to generate the fragment to be used as the donor for DNA repair after Cas9 cutting, we PCR-amplified the respective region from the donor strain, with primers whose 5'-most 70 base pairs were homologous to the recipient and whose 3'-most 20 base pairs were homologous to the donor, except in the case of transgenesis using *S. cerevisiae* donors other than DBVPG1373 or *S. paradoxus* donors other than Z1 (for Supplementary Figure 10), for which the 3'-most 20 base pairs were homologous to DBVPG1373 or Z1, respectively. The homology region at the 5' end of the gene ended at most 31 base pairs upstream of the 5' cut site, and the homology region at the 3' end of the gene started at most 33 base pairs downstream of the 3' cut site. The donor fragment product was purified with a column kit (Qiagen) and ethanol-precipitated. We then simultaneously transformed, using the lithium acetate method, the donor fragment and dual-guide Cas9 plasmid into the recipient strain, using donor:acceptor ratios of 0.38:10 to 1:5, with 0.5-26 ug of plasmid. In this transformation, heat shock was for 20-30 minutes at 39-42°C in transformations of *S. cerevisiae* DBVPG1373, and 10-20 minutes at 37-39°C for transformations of *S. paradoxus* Z1. Transformants were plated on YPD+G418 (300 µg/mL) to select for cells that retained the plasmid. From this selection we patched single colonies onto YPD without G418, under the expectation that by the time a lawn came up for each patch, its cells would have lost the Cas9 plasmid. Each such strain was Sanger-sequenced at the junctions of the recipient and donor sequence. Positive patches were streaked to single colonies on YPD plates, and cells from each such colony were used to inoculate a patch on a YPD plate and, separately,

to inoculate a patch on a YPD+G418 plate. Those colonies whose patches grew on the former but not on the latter were inferred to be cured of the plasmid and stored at -80°C. For all genes except *DYN1*, 2-3 such strains from each transformation were retained for thermotolerance assays and underwent Sanger sequencing of the entire locus to determine the exact swapped region (Supplementary Table 2). For *DYN1* allele-replacement in *S. paradoxus* Z1, the Cas9-based strategy yielded a single verified clone in which the *S. paradoxus* Z1 allele of *DYN1* was replaced by that of *S. cerevisiae* DBVPG1373, and likewise for *DYN1* allele-replacement in *S. cerevisiae* DBVPG1373. In each case, we mated the single swap clone to a wild-type of the respective species background, confirmed heterozygosity of the resulting diploid via allele-specific diagnostic PCR at the *DYN1* locus, sporulated, and dissected tetrads, allowing each spore to autodiploidize and grow up as a homozygote; we retained from one such tetrad the two spores that were homozygous at the *DYN1* locus for the swapped allele, as confirmed by sequencing, and stored these at -80°C.

Targeted-deletion hemizygote strains for *TAF2* were generated by knocking out the *S. cerevisiae* or the *S. paradoxus* allele in the interspecific hybrid (JR507) using the above methods for Cas9 cutting and repair, with the following differences. To generate the fragment to be used as the donor for DNA repair after Cas9 cutting, we PCR-amplified the NATMX cassette from pBC713 (a gift from John Dueber, constructed as in <sup>39</sup>) using primers whose 5'-most 70 base pairs were homologous to the recipient and whose 3'-most 20 base pairs were homologous to the cassette. The homology region at the 5' end of the gene ended 22 base pairs outside the 5' cut site (which was upstream of coding start), and the homology region at the 3' end of the gene started 33 base pairs outside the 3' cut site. Positive strains were confirmed by PCR. Two independent transformants were isolated and phenotyped for each genotype (Supplementary Table 2).

## Growth assays

### *Growth measurements of wild-type SGRP strains.*

For the growth timecourse of a given wild-type, purebred homozygote isolate from the SGRP collection at 28°C, it was streaked from a -80°C freezer stock onto a YPD agar plate and incubated at 26°C for 3 days. A single colony was inoculated into liquid YPD and grown for 24 hours at 28°C with shaking at 200 rpm. This culture was back-diluted into YPD at an OD<sub>600</sub> of ~0.05 and grown for an additional 5.5 hours at 28°C, 200 rpm, until reaching logarithmic phase. We transferred cells from each such pre-culture, and YPD, to each of 11 replicate wells of a 96-well plate, with volumes sufficient to yield a total volume of 150 µL per well at an OD<sub>600</sub> of 0.02. The plate was covered with a gas-permeable membrane (Sigma) and incubated with orbital shaking in an M200 plate reader (Tecan, Inc.) at 28°C for 24 hours. For curves in Supplementary Figure 1a, measurements for optical density at 595nm (OD<sub>595</sub>) were taken every 30 minutes and for each timepoint, the average was taken across replicate wells. To subtract background OD<sub>595</sub> for the resulting curve, we tabulated the mean of the five lowest values from all datapoints, excluding the first two, and subtracted this value from that of each timepoint, setting any negative value to 0. To smooth the resulting curve, we first replaced each timepoint measurement by its average with those of the timepoints immediately before and after it; then, for any timepoint whose measurement was not greater than or equal to the previous one, we set it to be equal to that previous data point. For Supplementary Figure 1b, the efficiency for a given growth curve (from a single well) was calculated as the difference between the OD<sub>595</sub> measured at the last four smoothed and averaged data points and that of the first four smoothed and averaged data points. Efficiencies from all of the wells from every *S. cerevisiae* isolate were combined and compared to efficiencies from all of the wells for every *S. paradoxus* isolate in a two-sample two-tailed *t*-test.

For the growth timecourse of a given SGRP strain at 39°C (Figure 1A), we used a large-volume flask growth paradigm to avoid the influence of plate effects on growth measurements at high temperature in the incubated microplate reader, as follows. Each strain was streaked from a -80°C freezer stock onto a YPD agar plate and incubated at 26°C for 3 days. A single colony of a given strain was inoculated into liquid YPD and grown for 24 hours at 28°C with shaking at 200 rpm. Each of these cultures was back-diluted into YPD at an OD<sub>600</sub> of 0.05 and grown for an additional 5.5-7.5 hours at 28°C, shaking at 200 rpm, until reaching logarithmic phase. We transferred cells from each such pre-culture, and YPD, to a glass 250 mL flask at the volumes required to attain an OD<sub>600</sub> of 0.05 in 100 mL YPD, and incubated it at 39°C with shaking at 200 rpm. OD<sub>600</sub> readings were taken every ~2 hours for ~18 hours. Figure 1A reports representative data from one of three such independent timecourse experiments. For curve fits, we used the `getInitial` and `SSlogis` functions in R to estimate starting values for the parameters of the logistic equation, and the `nls` function to fit the final parameters.

For efficiency measurements of a given SGRP isolate at 39°C in the large-volume format (Figure 1B), it was streaked from a -80°C freezer stock onto a YPD agar plate and incubated at 26°C for 3 days. Two single colonies of each isolate were each inoculated into liquid YPD and grown for 24 hours at 28°C with shaking at 200 rpm to generate two replicate pre-cultures. Each was back-diluted into YPD at an OD<sub>600</sub> at 600 nm of 0.05 and grown for an additional 5.5 hours at 28°C, shaking at 200 rpm, until reaching logarithmic phase. The two pre-cultures were each again back-diluted into YPD in 1-inch diameter glass tubes with a target OD<sub>600</sub> of 0.05; the actual OD<sub>600</sub> of each was measured, after which it was grown at 39°C with shaking at 200rpm for 24 hours, and OD<sub>600</sub> was measured again. The efficiency for each replicate was calculated as the difference between these final and initial OD<sub>600</sub> values. The pipeline from inoculation off solid plates through pre-culture, two back-dilutions, and growth at 39°C we refer to as a day's

growth experiment. For each day's experiments, we calculated the average efficiency across the replicates of each isolate  $\langle e_{\text{strain}} \rangle$ . We carried out two days' worth of replicate growth experiments for each isolate. For a given species, we used the complete cohort of measurements of  $\langle e_{\text{strain}} \rangle$  from all isolates of each species, across all days, as input into a two-sample, two-tailed  $t$ -test to evaluate whether the suite of  $e_{\text{strain}}$  values across isolates of *S. cerevisiae* was significantly different from the analogous set of values from *S. paradoxus*.

#### *Testing for heterosis in the DBVPG1373 x Z1 hybrid.*

To compare efficiency at 39°C between the DBVPG1373 x Z1 hybrid and its *S. cerevisiae* and *S. paradoxus* parent strains (Supplementary Figure 4), each strain was streaked from a -80°C freezer stock onto a YPD agar plate and incubated at 26°C for 3 days. Two single colonies of each isolate were each inoculated into liquid YPD and grown for 24 hours at 28°C with shaking at 200 rpm to generate two replicate pre-cultures. Each was back-diluted into YPD at an  $OD_{600}$  at 600 nm of 0.05 and grown for an additional 5.5 hours at 28°C, shaking at 200 rpm, until reaching logarithmic phase. The two pre-cultures were each again back-diluted into YPD in 1-inch diameter glass tubes with a target  $OD_{600}$  of 0.05; the actual  $OD_{600}$  of each was measured, after which it was grown at 39°C with shaking at 200rpm for 24 hours, and  $OD_{600}$  was measured again. The efficiency for each replicate,  $e_{\text{strain}}$ , was calculated as the difference between these final and initial  $OD_{600}$  values. The pipeline from inoculation off solid plates through pre-culture, two back-dilutions, and growth at 39°C we refer to as a day's growth experiment. We carried out two days' worth of replicate growth experiments for each isolate. To evaluate the significance of the difference between the growth of the hybrid and that of the *S. cerevisiae* parent, we used the complete cohort of measurements of  $e_{\text{strain}}$  from each strain, across all days, as input into a two-sample, two-tailed  $t$ -test.

*Growth measurements of targeted-deletion hemizygotes and allele-replacement strains at 28°C.*

For efficiency measurements of a given targeted-deletion hemizygote or allele-replacement strain at 28°C (Supplementary Figures 7, 8 and 10), pre-culture and plate reader assays were as for wild-type SGRP strains (see above), except that 6 or more replicate wells were cultured per strain. 2-3 independently isolated targeted-deletion hemizygotes or allele-replacement strains (Supplementary Table 2) were assayed for each genotype. Each timecourse of targeted-deletion hemizygote or allele-replacement strains also included the wild-type hybrid (JR507) or parent (*S. cerevisiae* DBVPG1373 or *S. paradoxus* Z1), respectively, with pre-culture and replication as above. Efficiency for a given growth curve (from a single well) was calculated as the difference between the OD<sub>600</sub> measured at the last four smoothed and averaged datapoints and that of the first four smoothed and averaged datapoints, with smoothing and averaging as detailed above. For Supplementary Figure 7, relative efficiency for a given well of a given targeted-deletion hemizygote strain at 28°C was tabulated as its efficiency divided by that of the average of all replicate wells of the wild-type hybrid (JR507) grown in the same experiment. For a given gene, we used the complete cohort of these measurements, from all isogenic hemizygotes, as input into a two-sample, two-tailed *t*-test to evaluate whether the relative efficiency of the strain in which the *S. cerevisiae* allele was knocked out was lower than the analogous quantity from the strain in which the *S. paradoxus* allele was knocked out. In Supplementary Figures 8 and 10, allele-replacement strains for a given gene were analyzed analogously, with the relative efficiency calculated against the respective wild-type parent, and with a one-sample, two-tailed *t*-test to evaluate whether the relative efficiency was significantly different from 1.

*Growth measurements of targeted-deletion hemizygotes and allele-replacement strains at 39°C.*

For efficiency measurements of a given targeted-deletion hemizygote strain at 39°C in the large-volume format (Figure 2B), each strain was streaked from a -80°C freezer stock onto a YPD agar plate and incubated at 26°C for 3 days. Two single colonies of a given strain were each inoculated into liquid YPD and grown for 24 hours at 28°C with shaking at 200 rpm. Each such pre-culture at stationary phase, or a log-phase outgrowth of it (which we used in the case of *DYN1* and *TAF2*: the pre-culture and YPD were added at the volumes required to attain an OD<sub>600</sub> of 0.05 and grown for an additional 5.5 hours at 28°C, shaking at 200 rpm, until the culture reached logarithmic phase) was used to inoculate YPD in 1-inch diameter glass culture tubes with a target cell density corresponding to an OD<sub>600</sub> of 0.05. The actual OD<sub>600</sub> of each was measured, after which it was grown at 39°C with shaking at 200 rpm for 24 hours, and OD<sub>600</sub> was measured again. The efficiency for each such replicate was then calculated as the difference between the final and initial OD<sub>600</sub> values. The pipeline from inoculation off solid plates through pre-culture, back-dilution, and growth at 39°C we refer to as a day's growth experiment for a targeted-deletion homozygote. In each such experiment, 2-3 independently isolated targeted-deletion hemizygotes of a given gene in each direction were all assayed on the same day, alongside the wild-type hybrid parent (JR507) with replicate structure and methods as above. From each day's experiments, we calculated the average efficiency across the replicates of the wild-type hybrid  $\langle e_{\text{hybrid}} \rangle$ , and we used this quantity to normalize the efficiency  $e_{\text{hemizyg}}$  measured for each replicate of each hemizygote strain assayed on that day. Thus, the final observable used for analysis for each replicate on a given day was  $e_{\text{hemizyg}}/\langle e_{\text{hybrid}} \rangle$ . We carried out 2-3 days' replicate growth experiments for each gene's hemizygotes. For a given gene, we used the complete cohort of these measurements of  $e_{\text{hemizyg}}/\langle e_{\text{hybrid}} \rangle$ , from all days and all isogenic hemizygotes, as input into a two-sample, one-tailed *t*-test to evaluate whether  $e_{\text{hemizyg}}/\langle e_{\text{hybrid}} \rangle$  of the strain in which the *S. cerevisiae* allele was knocked out was lower than the analogous quantity from the strain in which the *S. paradoxus* allele was knocked out. To evaluate the agreement between the effect size of

variation at a given locus in these experiments and the estimate from RH-seq data, we first processed the latter as follows. For a given insert in the RH-seq data set we defined thermotolerance as the ratio between  $\langle a_{\text{insert}} \rangle_{\text{total}}$  after growth at 39°C and  $\langle a_{\text{insert}} \rangle_{\text{total}}$  after growth at 28°C. We calculated the average thermotolerance across all inserts passing the cutoffs delineated in Supplementary Figure 5 that reflected hybrid strains harboring a wild-type copy of the allele from *S. paradoxus* Z1 of the focal gene and a transposon insertion in the *S. cerevisiae* DBVPG1373 allele; separately, we calculated the analogous quantity from hybrids with an insertion in the *S. paradoxus* allele. The ratio of these two thermotolerance values we refer to as the effect size for the locus of interest as measured in RH-seq. Next, to quantify the effect size for a given locus from our deletion-based hemizyosity experiment, we tabulated the average  $e_{\text{hemizyg}} / \langle e_{\text{hybrid}} \rangle$ , for all isogenic hybrid strains harboring a wild-type copy of the allele from *S. paradoxus* Z1 of the focal gene and a deletion of the *S. cerevisiae* DBVPG1373 allele; separately, we calculated the analogous quantity from strains in which the *S. paradoxus* allele was knocked out. The ratio between these two averages we consider the effect size from deletion-based hemizygotes. We used these two cohorts of effect size values (from RH-seq and deletion-based hemizyosity experiments) as input into a Pearson correlation calculation across all eight loci.

For growth measurements of a given allele-replacement strain at 39°C in the large-volume format (Figure 3, Supplementary Figures 7, 8 and 10), each strain was streaked from a -80°C freezer stock onto a YPD agar plate and incubated at 26°C for 3 days. 1-2 single colonies of each strain were each inoculated into liquid YPD and grown for 24 hours at 28°C with shaking at 200 rpm to generate 1-2 replicate pre-cultures. Each was back-diluted into YPD at an OD<sub>600</sub> of 0.05 and grown for an additional 5.5 hours at 28°C, shaking at 200 rpm, until reaching logarithmic phase. Each pre-culture were each again back-diluted into YPD in 1-inch diameter glass tubes with a target OD<sub>600</sub> of 0.05 (for experiments using a single pre-culture, it was now

split into two replicate pre-cultures, each of the same OD<sub>600</sub>); the actual OD<sub>600</sub> of each was measured, after which it was grown at 39°C with shaking at 200rpm for 24 hours, and OD<sub>600</sub> was measured again. The efficiency for each replicate was calculated as the difference between these final and initial OD<sub>600</sub> values. The pipeline from inoculation off solid plates through pre-culture, two back-dilutions, and growth at 39°C we refer to as a day's growth experiment for an allele-swap strain. In each such experiment, 2-3 independently isolated allele-swap strains targeting a given gene in a given background were all assayed on the same day, alongside the respective wild-type background strain (*S. cerevisiae* DBVPG1373 or *S. paradoxus* Z1) with replicate structure and methods as above. For each day's experiments, we calculated the average efficiency across the replicates of the wild-type parent  $\langle e_{\text{parent}} \rangle$ , and we used this quantity to normalize the efficiency  $e_{\text{swap}}$  measured for each replicate assayed on that day of each allele-swap strain in the respective background. Thus, the final measurement used for analysis for each replicate on a given day was  $e_{\text{swap}}/\langle e_{\text{parent}} \rangle$ . We carried out 2-3 days' worth of replicate growth experiments for each gene's allele-swap strains. For a given gene in a given background, we used the complete cohort of measurements of  $e_{\text{swap}}/\langle e_{\text{parent}} \rangle$  from all days and all allele-swap strains as input into a one-sample, one-tailed *t*-test to evaluate whether  $e_{\text{swap}}/\langle e_{\text{parent}} \rangle$  was significantly different from 1. For swaps of the *S. cerevisiae* allele of a given gene into *S. paradoxus*, we tested whether  $e_{\text{swap}}/\langle e_{\text{parent}} \rangle$  was greater than 1 (*i.e.* that the swap strain grew better at 39°C than did its parent), and for swaps of the *S. paradoxus* allele of a given gene into *S. cerevisiae*, we tested whether  $e_{\text{swap}}/\langle e_{\text{parent}} \rangle$  was less than 1 (*i.e.* that the swap strain grew worse at 39°C than its parent).

#### *Testing survival of wild-type parent strains at 39°C.*

To test the survival of heat-treated *S. paradoxus* Z1 and *S. cerevisiae* DBVPG1373 (Supplementary Figure 2), each strain was streaked from -80°C freezer stocks onto YPD agar

plates and incubated at 26°C for 3 days. 1-2 single colonies of each parent were inoculated into liquid YPD and grown for 24 hours at 28°C with shaking at 200 rpm to create 1-2 replicate pre-cultures. After 24 hours, we transferred cells from each pre-culture, and YPD, to each of 2-4 tubes at the volumes required to attain an OD<sub>600</sub> of 0.05 in 11 mL YPD. Two tubes were incubated at 28°C and two at 39°C, all with shaking at 200 rpm for 24 hours. OD<sub>600</sub> of each was measured; for each culture grown at 28°C, 100 µL of a 1.0x10<sup>-5</sup> serial dilution was plated to YPD, and for cultures grown at 39°C, *S. paradoxus* and *S. cerevisiae* were serially diluted to 10<sup>-1</sup> and 5.0x10<sup>-5</sup>, respectively. Plates were incubated at 26°C for three days until single colonies appeared. Colonies on each plate were counted, from which we tabulated the colony forming units per mL of culture plated, and normalized by the optical density of the original plated culture. The pipeline from pre-culture through treatment and colony counting we refer to as one day's worth of experiments. We used the results of two days' worth of experiments (a total of four for each species and temperature) as input into an ANOVA with species and temperature as factors, and took the *p*-value for the interaction between the factors as the estimate of the significance of the difference between species in the effect of temperature (of the 24-hour liquid culture) on cells' ability to grow into colonies (at the permissive temperature).

### **Microscopy and quantification**

For microscopy of *S. cerevisiae* DBVPG1373 and *S. paradoxus* Z1 (Supplementary Figure 3), each species was streaked from a -80°C freezer stock onto a YPD agar plate and incubated at 26°C for 3 days. Two single colonies of each strain were each inoculated into liquid YPD and grown for 24 hours at 28°C with shaking at 200 rpm to generate two replicate pre-cultures. Each was then back-diluted into YPD at an OD<sub>600</sub> of 0.05; one was grown at 39°C with shaking at 200rpm for 24 hours, and the other was grown at 28°C with shaking at 200rpm for 24 hours.

After the 24 hour growth period, 0.5 OD units of each culture were harvested through centrifugation and incubated in 66.5% ethanol for 1-4 hours at room temperature. Each sample was washed twice with 1X Dulbecco's Phosphate Buffered Saline (DPBS, Gibco), resuspended in 0.5 mL of 1X DPBS, and vortexed for 15 seconds on high. 5  $\mu$ L of each sample was transferred to an agarose pad made with 1% agarose and YPD. We observed samples on a Zeiss Axio Observer inverted bright-field microscope at 100X magnification. Images were taken using a Hamamatsu ORCA-Flash4.0 digital camera and visualized using ZEN software for image analysis. The exposure of each image was set automatically through ZEN, and brightness was adjusted using the "Min/Max" adjustment for black and white light. The pipeline from inoculation off solid plates through pre-culture, growth at 39°C or 28°C, fixation, and imaging we refer to as a day's experiment. We carried out 2 days' worth of experiments for each species, yielding a total of 17-21 images at each temperature, for each species. In each image, free-floating cells were scored manually as singlets or those with a small, medium, or large bud (for a total of 31-151 scored cells per species and temperature). The proportion of scored cells with large buds was tabulated for each day's experiment for each species and temperature.

### **Locus effect sizes**

Locus effect sizes in Supplementary Figure 9 were computed from the data in Figures 2B and 3 of the main text as follows. For analyses in the hybrid background, for a given locus we calculated  $m_{S,par}$ , the mean of all replicate measurements of  $e_{hemizyg}/\langle e_{hybrid} \rangle$  of hemizygote strains lacking the *S. paradoxus* allele. We took, as independent estimates of the locus effect size (each corresponding to a circle on the respective grey bar in Supplementary Figure 9), each measurement of  $e_{hemizyg}/\langle e_{hybrid} \rangle$  of a hemizygote strain lacking the *S. cerevisiae* allele, as

a ratio against  $m_{S.par}$ . For analyses in the *S. cerevisiae* DBVPG1373 background, for a given locus we used each measurement of  $e_{swap}/\langle e_{parent} \rangle$  as an independent estimate of the locus effect size (each corresponding to a circle on the respective orange bar in Supplementary Figure 9). For analyses in the *S. paradoxus* Z1 background, for a given locus we used each measurement of  $\langle e_{parent} \rangle/e_{swap}$  as an independent estimate of the locus effect size (each corresponding to a circle on the respective blue bar in Supplementary Figure 9).

## Supplementary Methods References

- 37 Roop, J. I. & Brem, R. B. Rare variants in hypermutable genes underlie common morphology and growth traits in wild *Saccharomyces paradoxus*. *Genetics* **195**, 513-525, doi:10.1534/genetics.113.155341 (2013).
- 38 Maurer, M. J. *et al.* Quantitative Trait Loci (QTL)-Guided Metabolic Engineering of a Complex Trait. *ACS Synth Biol* **6**, 566-581, doi:10.1021/acssynbio.6b00264 (2017).
- 39 Lee, M. E., DeLoache, W. C., Cervantes, B. & Dueber, J. E. A Highly Characterized Yeast Toolkit for Modular, Multipart Assembly. *ACS Synth Biol* **4**, 975-986, doi:10.1021/sb500366v (2015).

**Supplementary Table 1. Statistical tests and resulting *p*-values used in this study.** Each row reports the input into, and results from, and the indicated statistical test conducted in the indicated figure or table. Comparison, the strains interrogated for a difference in survival (Supplementary Figure 4) or growth efficiency (all other experiments) at the indicated temperature.

**Supplementary Table 2. Strains used in this study.** **a**, Wild-type diploid strains, including those used as parents of the *S. cerevisiae* x *S. paradoxus* hybrid and of allele-replacement transgenesis; SGRP, the Saccharomyces Genome Resequencing Project, version 2. **b**, Hemizygotes in the *S. cerevisiae* DBVPG1373 x *S. paradoxus* Z1 diploid hybrid constructed by targeted deletion of a given species' allele of the indicated gene with the KanMX or NatMX cassette.  $\Delta$ scYFG::KanMX/spYFG signifies that the *S. cerevisiae* DBVPG1373 allele of YFG was knocked out and the *S. paradoxus* Z1 allele of YFG is intact; strains with the DBVPG1373 allele intact and the Z1 allele knocked out are represented analogously. **c**, Allele replacement strains in *S. cerevisiae* DBVPG1373 or *S. paradoxus* Z1 diploid homozygote backgrounds. In genotype notes, e.g. in an *S. paradoxus* background,  $\Delta$ YFG(-X to +Y)::scYFG(-Z to +W) indicates that in *S. paradoxus* Z1, bases -X to +Y from gene YFG have been removed and replaced by bases -Z to +W of the allele of YFG from the indicated *S. cerevisiae* strain. Positive coordinates count in the 5' to 3' direction from the start codon (+1 corresponds to the A in the ATG), and negative coordinates count in the 3' to 5' direction from the start codon (-1 corresponds to the base directly 5' of the ATG). In cases where the replacement extended into a region of 100% conservation between species, the position of the last divergent nucleotide is shown.

**Supplementary Table 3. Depth of RH-seq library sequencing.** Each row reports the number of sequencing reads, before mapping, from an RH-seq library made from the DNA of transposon mutant hemizygotes in the *S. cerevisiae* DBVPG1373 x *S. paradoxus* Z1 diploid hybrid. The last four rows report results from the pool immediately after transposon mutagenesis, mutant clone isolation, pooling, and pre-growth at 28°C (time zero, T0). The first 24 rows report results from selection (bulk culture of the pool) at the indicated temperature after inoculation from the T0 sample.

**Supplementary Table 4. Primers used in this study.** Each row reports a pair of forward and reverse primers used for polymerase chain reaction during the course of the study. “N” represents a random nucleotide of A, T, C, or G. Primers are reported in the 5’ to 3’ direction, reading from left to right.

**Supplementary Table 5. Abundances of transposon-mutant clones in the interspecific hybrid from RH-seq.** Each row reports results of sequencing one transposon insertion in the *S. cerevisiae* DBVPG1373 x *S. paradoxus* Z1 diploid hybrid after selection of the transposon mutant pool, reflecting the abundance in the pool of the respective hemizygote clone harboring the insertion. Allele, the species parent’s homolog in which the transposon insertion lay. Chromosome, strand, location, and gene, the fine-scale position of the insertion. Abundance, read counts of the transposon insertion sequenced after selection of the mutant pool at the indicated temperature, normalized for library size and averaged across biological and technical replicates. Transposon insertions not detected in any replicate of the indicated selection were assigned an abundance of 1. CV, coefficient of variation over biological replicates of normalized read counts after selection at the indicated temperature.

**Supplementary Table 6. Tests of the impact on thermotolerance of variation at each gene in turn via reciprocal hemizygote analysis of clone abundances from RH-seq.** Each row reports the results of reciprocal hemizygote tests of thermotolerance of hemizygote transposon mutants at the indicated gene in the *S. cerevisiae* DBVPG1373 x *S. paradoxus* Z1 diploid hybrid, for a total of 3416 genes. Columns B-F report analyses upon the aggregation at the gene level of transposon mutant abundances (Supplementary Table 5) from all biological replicate experiments, filtered for quality control using all parameters detailed in Supplementary Figure 5. For columns G-L, the analogous calculations used data from only a single biological replicate culture, filtered for quality control using only the read-count and insert cutoffs from Supplementary Figure 5. Columns B-D report results of a two-tailed Mann-Whitney statistical test for a difference in the abundance after growth at 39°C, relative to the abundance after growth at 28°C, of hemizygotes harboring transposon insertions in the two species parents' homologs. The Benjamini-Hochberg method was used to correct for multiple testing. The remaining columns report the log ratio of normalized abundances of a hemizygote harboring a transposon insertion in the indicated species parent's homolog after culture at 39°C and 28°C, as a geometric mean across transposon mutants, from all biological replicates (columns E and F) or, in the case of top gene hits, from one biological replicate culture at 39°C and one at 28°C (columns G- L).

Supplementary Table 1

| Figure | Comparison                              | p-value     | Number of samples                                                                                                                                 | Type of statistical test                               |
|--------|-----------------------------------------|-------------|---------------------------------------------------------------------------------------------------------------------------------------------------|--------------------------------------------------------|
| 1B     | Scer vs Spar, SGRP, 39C                 | 3.78E-11    | 4 cultures for each strain, 3 strains per species, done on one day                                                                                | two-sample, two-tailed ttest                           |
| 2B     | $\Delta$ scAFG2 vs $\Delta$ spAFG2, 39C | 3.90E-19    | 8 cultures $\Delta$ scAFG2, 8 cultures $\Delta$ spAFG2, each done across 2 days accompanied by a total of 4 WT hybrid cultures for normalization  | two-sample, one-tailed ttest                           |
|        | $\Delta$ scAPC1 vs $\Delta$ spAPC1, 39C | 1.78E-05    | 8 cultures $\Delta$ scAPC1, 8 cultures $\Delta$ spAPC1, each done across 2 days accompanied by a total of 4 WT hybrid cultures for normalization  | two-sample, one-tailed ttest                           |
|        | $\Delta$ scCEP3 vs $\Delta$ spCEP3, 39C | 4.30E-06    | 8 cultures $\Delta$ scCEP3, 8 cultures $\Delta$ spCEP3, each done across 2 days accompanied by a total of 4 WT hybrid cultures for normalization  | two-sample, one-tailed ttest                           |
|        | $\Delta$ scDYN1 vs $\Delta$ spDYN1, 39C | 1.46E-03    | 8 cultures $\Delta$ scDYN1, 8 cultures $\Delta$ spDYN1, each done across 2 days accompanied by a total of 4 WT hybrid cultures for normalization  | two-sample, one-tailed ttest                           |
|        | $\Delta$ scESP1 vs $\Delta$ spESP1, 39C | 2.01E-17    | 8 cultures $\Delta$ scESP1, 8 cultures $\Delta$ spESP1, each done across 2 days accompanied by a total of 4 WT hybrid cultures for normalization  | two-sample, one-tailed ttest                           |
|        | $\Delta$ scMYO1 vs $\Delta$ spMYO1, 39C | 3.51E-16    | 12 cultures $\Delta$ scMYO1, 8 cultures $\Delta$ spMYO1, each done across 2 days accompanied by a total of 4 WT hybrid cultures for normalization | two-sample, one-tailed ttest                           |
|        | $\Delta$ scSCC2 vs $\Delta$ spSCC2, 39C | 2.03E-07    | 12 cultures $\Delta$ scSCC2, 8 cultures $\Delta$ spSCC2, each done across 2 days accompanied by a total of 4 WT hybrid cultures for normalization | two-sample, one-tailed ttest                           |
|        | $\Delta$ scTAF2 vs $\Delta$ spTAF2, 39C | 1.21E-03    | 8 cultures $\Delta$ scTAF2, 8 cultures $\Delta$ spTAF2, each done across 2 days accompanied by a total of 4 WT hybrid cultures for normalization  | two-sample, one-tailed ttest                           |
| 3A     | spAFG2 swap into Sc, 39C                | 3.08E-10    | 12 cultures swap, done across 2 days accompanied by a total of 4 cultures of WT Scer for normalization                                            | one-sample, one-tailed ttest for a difference from 1.0 |
|        | spAPC1 swap into Sc, 39C                | 0.0009157   | 8 cultures swap, done across 2 days accompanied by a total of 4 cultures of WT Scer for normalization                                             | one-sample, one-tailed ttest for a difference from 1.0 |
|        | spCEP3 swap into Sc, 39C                | 7.42E-07    | 8 cultures swap, done across 2 days accompanied by a total of 4 cultures of WT Scer for normalization                                             | one-sample, one-tailed ttest for a difference from 1.0 |
|        | spDYN1 swap into Sc, 39C                | 0.000212896 | 8 cultures swap, done across 2 days accompanied by a total of 4 cultures of WT Scer for normalization                                             | one-sample, one-tailed ttest for a difference from 1.0 |
|        | spESP1 swap into Sc, 39C                | 6.68E-16    | 8 cultures swap, done across 2 days accompanied by a total of 4 cultures of WT Scer for normalization                                             | one-sample, one-tailed ttest for a difference from 1.0 |
|        | spMYO1 swap into Sc, 39C                | 6.23E-05    | 8 cultures swap, done across 2 days accompanied by a total of 4 cultures of WT Scer for normalization                                             | one-sample, one-tailed ttest for a difference from 1.0 |
|        | spSCC2 swap into Sc, 39C                | 0.229286169 | 8 cultures swap, done across 2 days accompanied by a total of 4 cultures of WT Scer for normalization                                             | one-sample, one-tailed ttest for a difference from 1.0 |
|        | spTAF2 swap into Sc, 39C                | 3.16E-07    | 8 cultures swap, done across 2 days accompanied by a total of 4 cultures of WT Scer for normalization                                             | one-sample, one-tailed ttest for a difference from 1.0 |
| 3B     | scAFG2 swap into Sp, 39C                | 0.062137599 | 12 cultures swap, done across 3 days accompanied by a total of 6 cultures of WT Spar for normalization                                            | one-sample, one-tailed ttest for a difference from 1.0 |
|        | scAPC1 swap into Sp, 39C                | 2.18E-06    | 8 cultures swap, done across 2 days accompanied by a total of 4 cultures of WT Spar for normalization                                             | one-sample, one-tailed ttest for a difference from 1.0 |
|        | scCEP3 swap into Sp, 39C                | 0.100537936 | 8 cultures swap, done across 2 days accompanied by a total of 4 cultures of WT Spar for normalization                                             | one-sample, one-tailed ttest for a difference from 1.0 |
|        | scDYN1 swap into Sp, 39C                | 0.0324395   | 8 cultures swap, done across 2 days accompanied by a total of 4 cultures of WT Spar for normalization                                             | one-sample, one-tailed ttest for a difference from 1.0 |
|        | scESP1 swap into Sp, 39C                | 0.00043022  | 12 cultures swap, done across 3 days accompanied by a total of 6 cultures of WT Spar for normalization                                            | one-sample, one-tailed ttest for a difference from 1.0 |
|        | scMYO1 swap into Sp, 39C                | 0.035129968 | 8 cultures swap, done across 2 days accompanied by a total of 4 cultures of WT Spar for normalization                                             | one-sample, one-tailed ttest for a difference from 1.0 |

| Figure | Comparison                              | p-value     | Number of samples                                                                                                                              | Type of statistical test                               |
|--------|-----------------------------------------|-------------|------------------------------------------------------------------------------------------------------------------------------------------------|--------------------------------------------------------|
|        | scSCC2 swap into Sp, 39C                | 4.47E-05    | 8 cultures swap, done across 2 days accompanied by a total of 4 cultures of WT Spar for normalization                                          | one-sample, one-tailed ttest for a difference from 1.0 |
|        | scTAF2 swap into Sp, 39C                | 0.000790601 | 12 cultures swap, done across 3 days accompanied by a total of 6 cultures of WT Spar for normalization                                         | one-sample, one-tailed ttest for a difference from 1.0 |
| S1B    | Scer vs Spar, SGRP, 28C                 | 0.067565011 | 11 cultures for each strain, 3 strains per species, done on 1 day                                                                              | two-sample, two-sided ttest                            |
| S2     | Scer vs Spar, survival                  | 0.000152    | 4 cultures/plates per species per temperature, done across 2 days                                                                              | Type 2, two-factor ANOVA                               |
| S4     | Scer vs hybrid, 39C                     | 0.034666896 | 4 cultures for each species, each done across 2 days                                                                                           | two-sample, two-tailed ttest                           |
| S7     | $\Delta$ scAFG2 vs $\Delta$ spAFG2, 28C | 0.00636245  | 12 cultures $\Delta$ scAFG2, 12 cultures $\Delta$ spAFG2, each done on 1 day accompanied by a total of 6 WT hybrid cultures for normalization  | two-sample, two-tailed ttest                           |
|        | $\Delta$ scAPC1 vs $\Delta$ spAPC1, 28C | 0.152823509 | 22 cultures $\Delta$ scAPC1, 22 cultures $\Delta$ spAPC1, each done on 1 day accompanied by a total of 11 WT hybrid cultures for normalization | two-sample, two-tailed ttest                           |
|        | $\Delta$ scCEP3 vs $\Delta$ spCEP3, 28C | 0.494015046 | 22 cultures $\Delta$ scCEP3, 22 cultures $\Delta$ spCEP3, each done on 1 day accompanied by a total of 11 WT hybrid cultures for normalization | two-sample, two-tailed ttest                           |
|        | $\Delta$ scDYN1 vs $\Delta$ spDYN1, 28C | 0.018791311 | 22 cultures $\Delta$ scDYN1, 22 cultures $\Delta$ spDYN1, each done on 1 day accompanied by a total of 11 WT hybrid cultures for normalization | two-sample, two-tailed ttest                           |
|        | $\Delta$ scESP1 vs $\Delta$ spESP1, 28C | 9.51E-02    | 22 cultures $\Delta$ scESP1, 22 cultures $\Delta$ spESP1, each done on 1 day accompanied by a total of 11 WT hybrid cultures for normalization | two-sample, two-tailed ttest                           |
|        | $\Delta$ scMYO1 vs $\Delta$ spMYO1, 28C | 0.183956326 | 36 cultures $\Delta$ scMYO1, 24 cultures $\Delta$ spMYO1, each done on 1 day accompanied by a total of 12 WT hybrid cultures for normalization | two-sample, two-tailed ttest                           |
|        | $\Delta$ scSCC2 vs $\Delta$ spSCC2, 28C | 0.985768963 | 36 cultures $\Delta$ scSCC2, 24 cultures $\Delta$ spSCC2, each done on 1 day accompanied by a total of 12 WT hybrid cultures for normalization | two-sample, two-tailed ttest                           |
|        | $\Delta$ scTAF2 vs $\Delta$ spTAF2, 28C | 0.05848207  | 20 cultures $\Delta$ scTAF2, 20 cultures $\Delta$ spTAF2, each done on 1 day accompanied by a total of 10 WT hybrid cultures for normalization | two-sample, two-tailed ttest                           |
| S8     | spAFG2 swap into Sc, 28C                | 0.005190866 | 33 cultures swap, done on 1 day accompanied by a total of 11 cultures of WT Scer for normalization                                             | one-sample, two-tailed ttest for a difference from 1.0 |
|        | spAPC1 swap into Sc, 28C                | 0.854148856 | 22 cultures swap, done on 1 day accompanied by a total of 11 cultures of WT Scer for normalization                                             | one-sample, two-tailed ttest for a difference from 1.0 |
|        | spCEP3 swap into Sc, 28C                | 0.501394804 | 20 cultures swap, done on 1 day accompanied by a total of 10 cultures of WT Scer for normalization                                             | one-sample, two-tailed ttest for a difference from 1.0 |
|        | spDYN1 swap into Sc, 28C                | 0.685983102 | 22 cultures swap, done on 1 day accompanied by a total of 11 cultures of WT Scer for normalization                                             | one-sample, two-tailed ttest for a difference from 1.0 |
|        | spESP1 swap into Sc, 28C                | 0.003194129 | 22 cultures swap, done on 1 day accompanied by a total of 11 cultures of WT Scer for normalization                                             | one-sample, two-tailed ttest for a difference from 1.0 |
|        | spMYO1 swap into Sc, 28C                | 0.000410876 | 22 cultures swap, done on 1 day accompanied by a total of 11 cultures of WT Scer for normalization                                             | one-sample, two-tailed ttest for a difference from 1.0 |
|        | spSCC2 swap into Sc, 28C                | 0.010153082 | 22 cultures swap, done on 1 day accompanied by a total of 11 cultures of WT Scer for normalization                                             | one-sample, two-tailed ttest for a difference from 1.0 |
|        | spTAF2 swap into Sc, 28C                | 0.420065678 | 22 cultures swap, done on 1 day accompanied by a total of 11 cultures of WT Scer for normalization                                             | one-sample, two-tailed ttest for a difference from 1.0 |
|        | scAFG2 swap into Sp, 28C                | 0.212803536 | 22 cultures swap, done on 1 day accompanied by a total of 11 cultures of WT Spar for normalization                                             | one-sample, two-tailed ttest for a difference from 1.0 |
|        | scAPC1 swap into Sp, 28C                | 0.008477152 | 22 cultures swap, done on 1 day accompanied by a total of 11 cultures of WT Spar for normalization                                             | one-sample, two-tailed ttest for a difference from 1.0 |

| Figure | Comparison                            | p-value     | Number of samples                                                                                       | Type of statistical test                               |
|--------|---------------------------------------|-------------|---------------------------------------------------------------------------------------------------------|--------------------------------------------------------|
|        | scCEP3 swap into Sp, 28C              | 0.211757905 | 22 cultures swap, done on 1 day accompanied by a total of 11 cultures of WT Spar for normalization      | one-sample, two-tailed ttest for a difference from 1.0 |
|        | scDYN1 swap into Sp, 28C              | 7.10E-09    | 22 cultures swap, done on 1 day accompanied by a total of 11 cultures of WT Spar for normalization      | one-sample, two-tailed ttest for a difference from 1.0 |
|        | scESP1 swap into Sp, 28C              | 0.136933579 | 22 cultures swap, done on 1 day accompanied by a total of 11 cultures of WT Spar for normalization      | one-sample, two-tailed ttest for a difference from 1.0 |
|        | scMYO1 swap into Sp, 28C              | 3.37E-10    | 22 cultures swap, done on 1 day accompanied by a total of 11 cultures of WT Spar for normalization      | one-sample, two-tailed ttest for a difference from 1.0 |
|        | scSCC2 swap into Sp, 28C              | 9.59E-07    | 22 cultures swap, done on 1 day accompanied by a total of 11 cultures of WT Spar for normalization      | one-sample, two-tailed ttest for a difference from 1.0 |
|        | scTAF2 swap into Sp, 28C              | 2.40E-14    | 22 cultures swap, done on 1 day accompanied by a total of 11 cultures of WT Spar for normalization      | one-sample, two-tailed ttest for a difference from 1.0 |
| S10A   | spESP1 from Z1 into scD1373, 39C      | 1.18E-07    | 4 cultures swap, done across 2 days accompanied by a total of 4 cultures of WT Scer for normalization   | one-sample, one-tailed ttest for a difference from 1.0 |
|        | spESP1 from IFO1804 into scD1373, 39C | 2.04E-16    | 8 cultures swap, done across 2 days accompanied by a total of 4 cultures of WT Scer for normalization   | one-sample, one-tailed ttest for a difference from 1.0 |
|        | spESP1 from N17 into scD1373, 39C     | 1.52E-17    | 8 cultures swap, done across 2 days accompanied by a total of 4 cultures of WT Scer for normalization   | one-sample, one-tailed ttest for a difference from 1.0 |
|        | spESP1 from Z1 into scD1373, 28C      | 0.003194129 | 22 cultures swap, done on 1 day accompanied by a total of 11 cultures of WT Scer for normalization      | one-sample, two-tailed ttest for a difference from 1.0 |
|        | spESP1 from IFO1804 into scD1373, 28C | 0.679833392 | 22 cultures swap, done on 1 day accompanied by a total of 11 cultures of WT Scer for normalization      | one-sample, two-tailed ttest for a difference from 1.0 |
|        | spESP1 from N17 into scD1373, 28C     | 0.823594774 | 22 cultures swap, done on 1 day accompanied by a total of 11 cultures of WT Scer for normalization      | one-sample, two-tailed ttest for a difference from 1.0 |
| S10B   | scAPC1 from D1373 into spZ1, 39C      | 0.027114162 | 8 cultures swap, done across 4 days accompanied by a total of 8 cultures of WT Spar for normalization   | one-sample, one-tailed ttest for a difference from 1.0 |
|        | scAPC1 from D1788 into spZ1, 39C      | 0.001447488 | 12 cultures swap, done across 6 days accompanied by a total of 12 cultures of WT Spar for normalization | one-sample, one-tailed ttest for a difference from 1.0 |
|        | scAPC1 from YPS128 into spZ1, 39C     | 0.033387302 | 10 cultures swap, done across 5 days accompanied by a total of 10 cultures of WT Spar for normalization | one-sample, one-tailed ttest for a difference from 1.0 |
|        | scAPC1 from D6044 into spZ1, 39C      | 0.000188618 | 18 cultures swap, done across 6 days accompanied by a total of 12 cultures of WT Spar for normalization | one-sample, one-tailed ttest for a difference from 1.0 |
|        | scAPC1 from D1373 into spZ1, 28C      | 0.008477152 | 22 cultures swap, done on 1 day accompanied by a total of 11 cultures of WT Spar for normalization      | one-sample, two-tailed ttest for a difference from 1.0 |
|        | scAPC1 from D1788 into spZ1, 28C      | 2.41E-06    | 22 cultures swap, done on 1 day accompanied by a total of 11 cultures of WT Spar for normalization      | one-sample, two-tailed ttest for a difference from 1.0 |
|        | scAPC1 from YPS128 into spZ1, 28C     | 0.085740307 | 22 cultures swap, done on 1 day accompanied by a total of 11 cultures of WT Spar for normalization      | one-sample, two-tailed ttest for a difference from 1.0 |
|        | scAPC1 from D6044 into spZ1, 28C      | 0.338841317 | 33 cultures swap, done on 1 day accompanied by a total of 11 cultures of WT Spar for normalization      | one-sample, two-tailed ttest for a difference from 1.0 |

Supplementary Table 2

| Species                                                   | Strain name | Background    | Genotype/details                                                                                                                                 | Source     | Allele donor strain |
|-----------------------------------------------------------|-------------|---------------|--------------------------------------------------------------------------------------------------------------------------------------------------|------------|---------------------|
| <b>A. Wild-type diploid and hybrid parent strains</b>     |             |               |                                                                                                                                                  |            |                     |
| S. cer                                                    | DBVPG1373   |               | soil isolate from Netherlands                                                                                                                    | SGRP       |                     |
| S. cer                                                    | YPS128      |               | soil isolate from USA                                                                                                                            | SGRP       |                     |
| S. cer                                                    | DBVPG1788   |               | soil isolate from Finland                                                                                                                        | SGRP       |                     |
| S. par                                                    | Z1          |               | tree bark isolate from UK                                                                                                                        | SGRP       |                     |
| S. par                                                    | DBVPG6304   |               | isolate from <i>Drosophila</i> from USA                                                                                                          | SGRP       |                     |
| S. par                                                    | IFO1804     |               | tree bark isolate from Japan                                                                                                                     | SGRP       |                     |
| S. cer                                                    | JR501       | DBVPG1373     | $\Delta$ URA3::HygMX/ $\Delta$ URA3::HygMX                                                                                                       | this study |                     |
| S. par                                                    | JR499       | Z1            | $\Delta$ URA3::HygMX/ $\Delta$ URA3::HygMX                                                                                                       | this study |                     |
| S. cer x S. par hybrid                                    | JR507       | JR501 x JR499 | $\Delta$ URA3::HygMX/ $\Delta$ URA3::HygMX, each S. par and S. cer allele KO'd with HygMX. This is the starting strain for PiggyBac mutagenesis. | this study |                     |
| S.cer                                                     | DBVPG6044   |               | bili wine isolate from West Africa                                                                                                               | SGRP       |                     |
| S.par                                                     | N17         |               | oak exudate isolate from Russia                                                                                                                  | SGRP       |                     |
| <b>B. Targeted-deletion reciprocal hemizygote strains</b> |             |               |                                                                                                                                                  |            |                     |
| S. cer x S. par hybrid                                    | CW38        | JR507         | $\Delta$ scAFG2::KanMX/spAFG2                                                                                                                    | this study |                     |
| S. cer x S. par hybrid                                    | CW39        | JR507         | $\Delta$ scAFG2::KanMX/spAFG2                                                                                                                    | this study |                     |
| S. cer x S. par hybrid                                    | CW40        | JR507         | scAFG2/ $\Delta$ spAFG2::KanMX                                                                                                                   | this study |                     |
| S. cer x S. par hybrid                                    | CW41        | JR507         | scAFG2/ $\Delta$ spAFG2::KanMX                                                                                                                   | this study |                     |
| S. cer x S. par hybrid                                    | CW56        | JR507         | $\Delta$ scCEP3::KanMX/spCEP3                                                                                                                    | this study |                     |
| S. cer x S. par hybrid                                    | CW57        | JR507         | $\Delta$ scCEP3::KanMX/spCEP3                                                                                                                    | this study |                     |
| S. cer x S. par hybrid                                    | CW52        | JR507         | scCEP3/ $\Delta$ spCEP3::KanMX                                                                                                                   | this study |                     |
| S. cer x S. par hybrid                                    | CW53        | JR507         | scCEP3/ $\Delta$ spCEP3::KanMX                                                                                                                   | this study |                     |
| S. cer x S. par hybrid                                    | CW58        | JR507         | $\Delta$ scMYO1::KanMX/spMYO1                                                                                                                    | this study |                     |
| S. cer x S. par hybrid                                    | CW59        | JR507         | $\Delta$ scMYO1::KanMX/spMYO1                                                                                                                    | this study |                     |
| S. cer x S. par hybrid                                    | CW85        | JR507         | $\Delta$ scMYO1::KanMX/spMYO1                                                                                                                    | this study |                     |
| S. cer x S. par hybrid                                    | CW60        | JR507         | scMYO1/ $\Delta$ spMYO1::KanMX                                                                                                                   | this study |                     |
| S. cer x S. par hybrid                                    | CW61        | JR507         | scMYO1/ $\Delta$ spMYO1::KanMX                                                                                                                   | this study |                     |
| S. cer x S. par hybrid                                    | CW80        | JR507         | $\Delta$ scSCC2::KanMX/spSCC2                                                                                                                    | this study |                     |
| S. cer x S. par hybrid                                    | CW81        | JR507         | $\Delta$ scSCC2::KanMX/spSCC2                                                                                                                    | this study |                     |
| S. cer x S. par hybrid                                    | CW82        | JR507         | $\Delta$ scSCC2::KanMX/spSCC2                                                                                                                    | this study |                     |
| S. cer x S. par hybrid                                    | CW83        | JR507         | scSCC2/ $\Delta$ spSCC2::KanMX                                                                                                                   | this study |                     |
| S. cer x S. par hybrid                                    | CW84        | JR507         | scSCC2/ $\Delta$ spSCC2::KanMX                                                                                                                   | this study |                     |
| S. cer x S. par hybrid                                    | CW116       | JR507         | $\Delta$ scESP1::KanMX/spESP1                                                                                                                    | this study |                     |
| S. cer x S. par hybrid                                    | CW122       | JR507         | $\Delta$ scESP1::KanMX/spESP1                                                                                                                    | this study |                     |
| S. cer x S. par hybrid                                    | CW114       | JR507         | scESP1/ $\Delta$ spESP1::KanMX                                                                                                                   | this study |                     |
| S. cer x S. par hybrid                                    | CW193       | JR507         | scESP1/ $\Delta$ spESP1::KanMX                                                                                                                   | this study |                     |
| S. cer x S. par hybrid                                    | CW131       | JR507         | $\Delta$ scAPC1::KanMX/spAPC1                                                                                                                    | this study |                     |
| S. cer x S. par hybrid                                    | CW160       | JR507         | $\Delta$ scAPC1::KanMX/spAPC1                                                                                                                    | this study |                     |
| S. cer x S. par hybrid                                    | CW185       | JR507         | scAPC1/ $\Delta$ spAPC1::KanMX                                                                                                                   | this study |                     |
| S. cer x S. par hybrid                                    | CW189       | JR507         | scAPC1/ $\Delta$ spAPC1::KanMX                                                                                                                   | this study |                     |
| S. cer x S. par hybrid                                    | CW172       | JR507         | $\Delta$ scDYN1::KanMX/spDYN1                                                                                                                    | this study |                     |
| S. cer x S. par hybrid                                    | CW173       | JR507         | $\Delta$ scDYN1::KanMX/spDYN1                                                                                                                    | this study |                     |
| S. cer x S. par hybrid                                    | CW112       | JR507         | scDYN1/ $\Delta$ spDYN1::KanMX                                                                                                                   | this study |                     |
| S. cer x S. par hybrid                                    | CW113       | JR507         | scDYN1/ $\Delta$ spDYN1::KanMX                                                                                                                   | this study |                     |
| S. cer x S. par hybrid                                    | CW213       | JR507         | $\Delta$ scTAF2::NatMX/spTAF2                                                                                                                    | this study |                     |
| S. cer x S. par hybrid                                    | CW214       | JR507         | $\Delta$ scTAF2::NatMX/spTAF2                                                                                                                    | this study |                     |
| S. cer x S. par hybrid                                    | CW221       | JR507         | scTAF2/ $\Delta$ spTAF2::NatMX                                                                                                                   | this study |                     |

| Species                              | Strain name | Background | Genotype/details                                      | Source     | Allele donor strain |
|--------------------------------------|-------------|------------|-------------------------------------------------------|------------|---------------------|
| S. cer x S. par hybrid               | CW222       | JR507      | scTAF2/ $\Delta$ spTAF2::NatMX                        | this study |                     |
| <b>C. Allele replacement strains</b> |             |            |                                                       |            |                     |
| S. cer                               | CW64        | DBVPG1373  | $\Delta$ AFG2(-343 to 2390) :: spAFG2(-365 to 2391)   | this study | Z1                  |
| S. cer                               | CW65        | DBVPG1373  | $\Delta$ AFG2(-342 to 2391) :: spAFG2(-365 to 2391)   | this study | Z1                  |
| S. cer                               | CW66        | DBVPG1373  | $\Delta$ AFG2(-342 to 2391) :: spAFG2(-365 to 2391)   | this study | Z1                  |
| S. cer                               | CW73        | DBVPG1373  | $\Delta$ CEP3(-236 to 1831) :: spCEP3(-229 to 1831)   | this study | Z1                  |
| S. cer                               | CW74        | DBVPG1373  | $\Delta$ CEP3(-236 to 1840) :: spCEP3(-229 to 1840)   | this study | Z1                  |
| S. cer                               | CW104       | DBVPG1373  | $\Delta$ MYO1(-978 to 5848) :: spMYO1(-983 to 5849)   | this study | Z1                  |
| S. cer                               | CW105       | DBVPG1373  | $\Delta$ MYO1(-978 to 5848) :: spMYO1(-983 to 5849)   | this study | Z1                  |
| S. cer                               | CW98        | DBVPG1373  | $\Delta$ ESP1(-384 to 4934) :: spESP1(-361 to 4933)   | this study | Z1                  |
| S. cer                               | CW100       | DBVPG1373  | $\Delta$ ESP1(-384 to 4934) :: spESP1(-361 to 4933)   | this study | Z1                  |
| S. cer                               | CW109       | DBVPG1373  | $\Delta$ SCC2(-405 to 4543) :: spSCC2(-419 to 4543)   | this study | Z1                  |
| S. cer                               | CW110       | DBVPG1373  | $\Delta$ SCC2(-377 to 4543) :: spSCC2(-388 to 4543)   | this study | Z1                  |
| S. cer                               | CW115       | DBVPG1373  | $\Delta$ APC1(-525 to 5270) :: spAPC1(-518 to 5270)   | this study | Z1                  |
| S. cer                               | CW210       | DBVPG1373  | $\Delta$ APC1(1626 to 5270) :: spAPC1(1623 to 5270)   | this study | Z1                  |
| S. cer                               | CW254       | DBVPG1373  | $\Delta$ DYN1(-284 to 12340) :: spDYN1(-272 to 12340) | this study | Z1                  |
| S. cer                               | CW255       | DBVPG1373  | $\Delta$ DYN1(-284 to 12340) :: spDYN1(-272 to 12340) | this study | Z1                  |
| S. cer                               | CW174       | DBVPG1373  | $\Delta$ TAF2(-831 to 4328) :: spTAF2(-864 to 4319)   | this study | Z1                  |
| S. cer                               | CW202       | DBVPG1373  | $\Delta$ TAF2(-831 to 4317) :: spTAF2(-864 to 4308)   | this study | Z1                  |
| S. par                               | CW67        | Z1         | $\Delta$ AFG2(-293 to 2391) :: scAFG2(-270 to 2391)   | this study | DBVPG1373           |
| S. par                               | CW69        | Z1         | $\Delta$ AFG2(-293 to 2391) :: scAFG2(-270 to 2391)   | this study | DBVPG1373           |
| S. par                               | CW63        | Z1         | $\Delta$ CEP3(-187 to 1816) :: scCEP3(-194 to 1816)   | this study | DBVPG1373           |
| S. par                               | CW77        | Z1         | $\Delta$ CEP3(-187 to 1816) :: scCEP3(-194 to 1816)   | this study | DBVPG1373           |
| S. par                               | CW124       | Z1         | $\Delta$ MYO1(-907 to 5826) :: scMYO1(-903 to 5824)   | this study | DBVPG1373           |
| S. par                               | CW126       | Z1         | $\Delta$ MYO1(-907 to 5826) :: scMYO1(-903 to 5824)   | this study | DBVPG1373           |
| S. par                               | CW141       | Z1         | $\Delta$ ESP1(-418 to 4962) :: scESP1(-439 to 4963)   | this study | DBVPG1373           |
| S. par                               | CW142       | Z1         | $\Delta$ ESP1(-418 to 4951) :: scESP1(-439 to 4952)   | this study | DBVPG1373           |
| S. par                               | CW165       | Z1         | $\Delta$ SCC2(-456 to 4556) :: scSCC2(-441 to 4556)   | this study | DBVPG1373           |
| S. par                               | CW166       | Z1         | $\Delta$ SCC2(-456 to 4556) :: scSCC2(-441 to 4556)   | this study | DBVPG1373           |
| S. par                               | CW132       | Z1         | $\Delta$ APC1(-538 to 5280) :: scAPC1(-545 to 5280)   | this study | DBVPG1373           |
| S. par                               | CW133       | Z1         | $\Delta$ APC1(-542 to 5275) :: scAPC1(-549 to 5275)   | this study | DBVPG1373           |
| S. par                               | CW169       | Z1         | $\Delta$ TAF2(-806 to 4348) :: scTAF2(-774 to 4357)   | this study | DBVPG1373           |
| S. par                               | CW170       | Z1         | $\Delta$ TAF2(-806 to 4348) :: scTAF2(-774 to 4357)   | this study | DBVPG1373           |
| S. par                               | CW223       | Z1         | $\Delta$ DYN1(-231 to 12377) :: scDYN1(-243 to 12377) | this study | DBVPG1373           |
| S. par                               | CW224       | Z1         | $\Delta$ DYN1(-231 to 12377) :: scDYN1(-243 to 12377) | this study | DBVPG1373           |
| S. cer                               | CW284       | DBVPG1373  | $\Delta$ ESP1(-384 to 4934) :: spESP1(-361 to 4934)   | this study | IFO1804             |
| S. cer                               | CW288       | DBVPG1373  | $\Delta$ ESP1(-384 to 4934) :: spESP1(-361 to 4934)   | this study | IFO1804             |
| S. cer                               | CW287       | DBVPG1373  | $\Delta$ ESP1(-384 to 4934) :: spESP1(-361 to 4933)   | this study | N17                 |
| S. cer                               | CW324       | DBVPG1373  | $\Delta$ ESP1(-384 to 4934) :: spESP1(-361 to 4933)   | this study | N17                 |
| S. par                               | CW300       | Z1         | $\Delta$ APC1(-547 to 5280) :: scAPC1(-554 to 5280)   | this study | YPS128              |
| S. par                               | CW322       | Z1         | $\Delta$ APC1(-547 to 5280) :: scAPC1(-554 to 5280)   | this study | YPS128              |
| S. par                               | CW307       | Z1         | $\Delta$ APC1(-547 to 5280) :: scAPC1(-554 to 5280)   | this study | DBVPG1788           |
| S. par                               | CW308       | Z1         | $\Delta$ APC1(-547 to 5280) :: scAPC1(-554 to 5280)   | this study | DBVPG1788           |
| S. par                               | CW309       | Z1         | $\Delta$ APC1(-547 to 5280) :: scAPC1(-554 to 5280)   | this study | DBVPG6044           |
| S. par                               | CW310       | Z1         | $\Delta$ APC1(-547 to 5280) :: scAPC1(-554 to 5280)   | this study | DBVPG6044           |
| S. par                               | CW311       | Z1         | $\Delta$ APC1(-547 to 5280) :: scAPC1(-554 to 5280)   | this study | DBVPG6044           |

Supplementary Table 3

| Sample         | Biological Replicate | Technical Replicate | Sample Name | Total Reads |
|----------------|----------------------|---------------------|-------------|-------------|
| 28°C selection | A                    | 1                   | 28A1        | 76449364    |
|                |                      | 2                   | 28A2        | 76081620    |
|                |                      | 3                   | 28A3        | 40064389    |
|                |                      | 4                   | 28A4        | 32128802    |
|                | B                    | 1                   | 28B1        | 38456506    |
|                |                      | 2                   | 28B2        | 42273157    |
|                |                      | 3                   | 28B3        | 35808821    |
|                |                      | 4                   | 28B4        | 40086768    |
|                | C                    | 1                   | 28C1        | 35599937    |
|                |                      | 2                   | 28C2        | 43057928    |
|                |                      | 3                   | 28C3        | 40232557    |
|                |                      | 4                   | 28C4        | 40422653    |
| 39°C selection | A                    | 1                   | 39A1        | 39511628    |
|                |                      | 2                   | 39A2        | 43721972    |
|                |                      | 3                   | 39A3        | 39511546    |
|                |                      | 4                   | 39A4        | 40650720    |
|                | B                    | 1                   | 39B1        | 42888908    |
|                |                      | 2                   | 39B2        | 38950323    |
|                |                      | 3                   | 39B3        | 37231294    |
|                |                      | 4                   | 39B4        | 38026468    |
|                | C                    | 1                   | 39C1        | 37298412    |
|                |                      | 2                   | 39C2        | 37208024    |
|                |                      | 3                   | 39C3        | 37982258    |
|                |                      | 4                   | 39C4        | 38473876    |
| T0             | //                   | 1                   | T0-1        | 80596903    |
|                |                      | 2                   | T0-2        | 88916613    |
|                |                      | 3                   | T0-3        | 41141713    |
|                |                      | 4                   | T0-4        | 35890054    |

Supplementary Table 4

|                     | Forward primer (5'-3')                                                                               | Reverse primer (5'-3')                                                    |
|---------------------|------------------------------------------------------------------------------------------------------|---------------------------------------------------------------------------|
| RH-seq library prep | ATGATACGGCGACCACCGAGATCTACACTCTT<br>TCCCTACACGACGCTCTTCCGATCTNNNNNN<br>AGCAATATTTCAAGAATGCATGCGTCAAT | CAAGCAGAAGACGGCATAACGAGATN<br>NNNNNGTGACTGGAGTTCAGACGTG<br>TGCTCTTCCGATCT |
